# Supplementary material for: High mobility organic semiconductor for constructing high efficiency carbon nitride heterojunction photocatalysts
Source: Royal Society of Chemistry journal article supplement (doi:10.1039/d0tc05123c), 2020-01-01
Supplement: d0tc05123c1.pdf [file d0tc05123c1.pdf]

## Supporting Information for

# High mobility organic semiconductor for constructing high efficiency carbon nitride heterojunction photocatalysts

Yan Yi,<sup>†a</sup> Siyu Wang,<sup>†a</sup> Hantang Zhang,<sup>\*a</sup> Jie Liu,<sup>c</sup> Xiuqiang Lu,<sup>d</sup> Lang Jiang,<sup>c</sup> Chengji Sui,<sup>a</sup> Hai Fan,<sup>a</sup> Shiyun Ai<sup>\*a</sup> and Jianwu Sun<sup>\*b</sup>

<sup>a</sup>College of Chemistry and Material Science & College of Resources and Environment, Shandong Agriculture University, TaiAn 271018, China. E-mail: htzhang@sdau.edu.cn, ashiy@sdau.edu.cn

<sup>b</sup>Department of Physics, Chemistry and Biology (IFM), Linköping University, Linköping SE-58183, Sweden. E-mail: jianwu.sun@liu.se

<sup>c</sup>Beijing National Laboratory for Molecular Sciences, Key Laboratory of Organic Solids, Institute of Chemistry, Chinese Academy of Sciences, Beijing 100190, China.

<sup>d</sup>School of Ocean Science and Biochemistry Engineering, Fuqing Branch of Fujian Normal University, Fuqing 350300, China.

<sup>†</sup> Equal contribution

## 1. Experimental Section

### 1.1 Molecular structure and coordination environment of CuPc

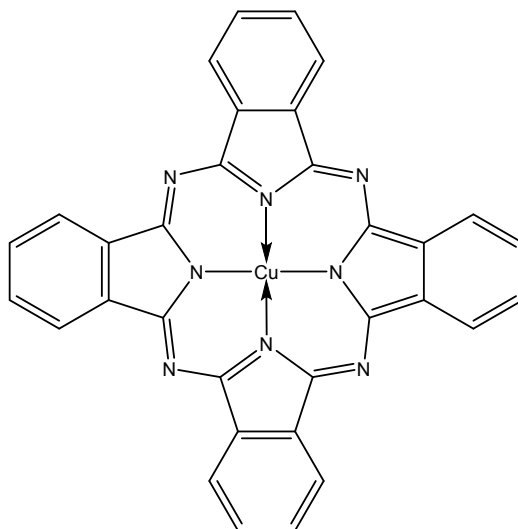

Fig. 1 Molecular structure of CuPc.

CuPc has a special two-dimensional conjugated  $\pi$ -electronic structure. In the molecular structure of CuPc, the Cu atom is surrounded by 4 N atoms. Copper is connected with two of the N atoms by ionic bonds, and with the other two N atoms by coordination bonds.

### 1.2 Synthesis of bulk CN

Bulk CN was synthesized by thermal condensation of urea. Typically, 25g urea was put in a sealed crucible and then heated to 550 °C at a speed of 3°/min in a muffle furnace. The temperature was maintained at 550 °C for 4 hours and then cooled down to room temperature.

### 1.3 Two-step method for fabrication of CN nanosheet

Step 1: Secondary calcination. Bulk CN was first grinded by a mortar. Then CN powders were put in an open crucible to allow the materials to be well exposed to air. Then it was heated to 520 °C at a speed of 5°C/min and maintained at 520 °C for 2 hours.

Step 2: High-power ultrasonic exfoliation. Typically, 50mg CN powders obtained after step 1 were dispersed in 10ml IPA. Then CN nanosheets were obtained by ultrasonic treatment of the suspension using a 500w ultrasonic apparatus.

### 1.4 Preparation of CN/CuPc heterojunction photocatalysts

A certain amount of CuPc (0 wt%, 3 wt%, 5 wt%, 7 wt%, 10 wt%) was added into the IPA suspension of CN nanosheet. The hybrid suspension was ultrasonic for 2 hours at low power of 50w. Then the well mixed suspension was centrifuged at 5000r/min for 10min. The supernatant was discarded and CN/CuPc heterojunction photocatalysts were obtained.

## **1.5 Electrochemical characterization**

### **1.5.1 Photocurrent response of CN/CuPc**

0.5M  $\text{Na}_2\text{SO}_4$  solution was used as the electrolyte. 2mg/ml CN (or CN/CuPc) isopropanol suspension was dripped onto the ITO electrode and baked dry with an infrared lamp. A 300w Xenon lamp was used as the light source.

### **1.5.2 EIS of CN and CN/CuPc**

5mM  $[\text{Fe}(\text{CN})_6]^{3-/4-}$  (1:1) solution containing 0.1 M KCl was used as the electrolyte. 2mg/ml CN (or CN/CuPc) isopropanol suspension was dripped onto the glassy carbon electrode and baked dry with an infrared lamp. EIS was tested using a three-electrode system (Reference electrode: saturated calomel electrode).

### **1.5.3 Mott-Schottky test of CN and CuPc**

0.5M  $\text{Na}_2\text{SO}_4$  solution was used as the electrolyte. 2mg/ml CN (or CuPc) isopropanol suspension was dripped onto the glassy carbon electrode and baked dry with an infrared lamp. The Mott-Schottky test was conducted using a three-electrode system (Reference electrode: saturated calomel electrode).

## 2. Characterization

### 2.1 Nitrogen adsorption–desorption isotherms

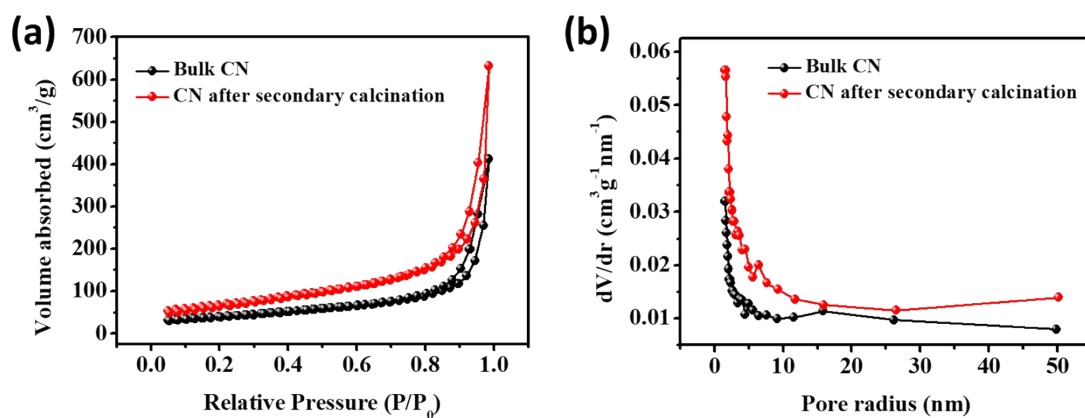

Fig. S2 The nitrogen adsorption–desorption isotherms of Bulk CN and CN after secondary calcination. (a) BET and (b) BJH.

### 2.2 XRD of CN before and after ultrasonic treatment

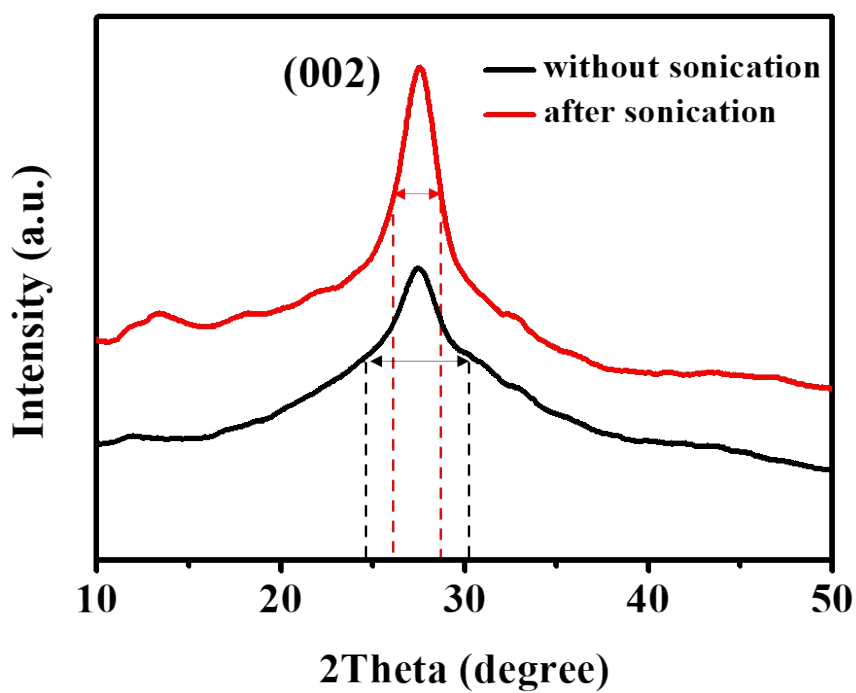

Fig. S3 XRD of CN before and after ultrasonic treatment.

### 2.3 AFM characterization of CN nanosheets

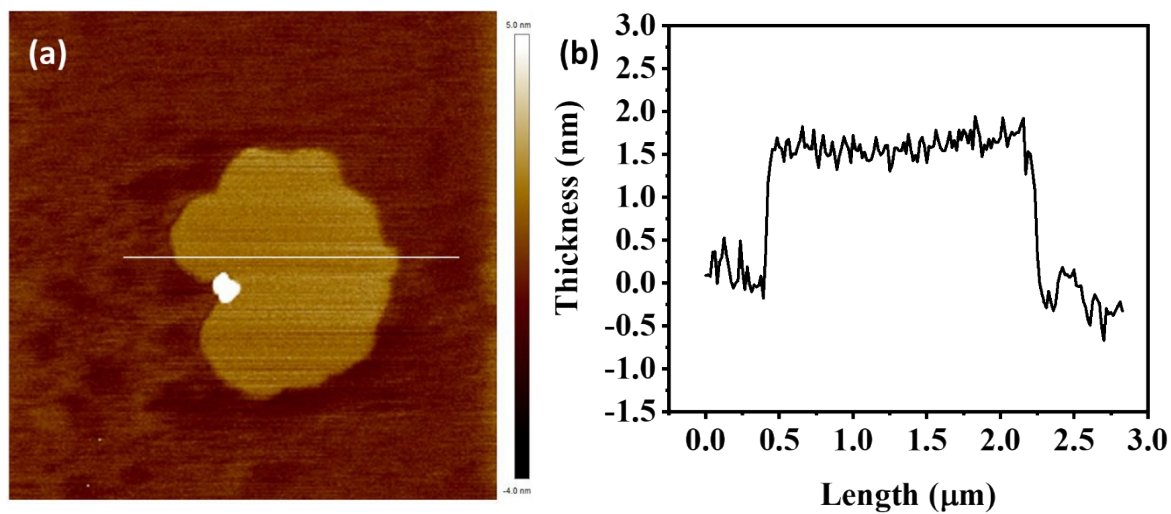

Fig. S4 (a) AFM height image of CN nanosheet and (b) corresponding height results.

### 2.4 TEM-assisted Energy Disperse Spectroscopy (EDS) of CN/CuPc heterojunction

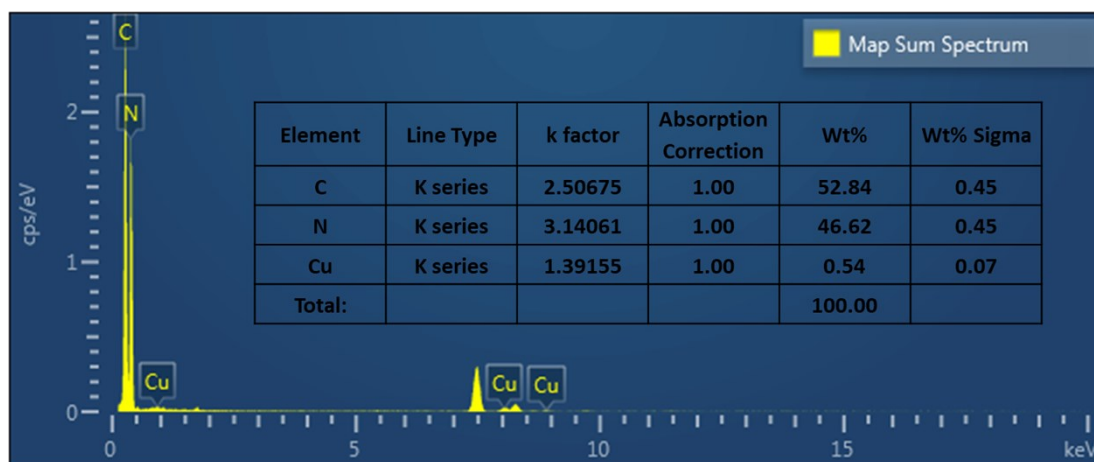

Fig. S5 Sum spectrum of TEM assisted EDS of CN/CuPc heterojunction (7 wt% CuPc).

## 2.5 N XPS of CN and CN/CuPc heterojunction

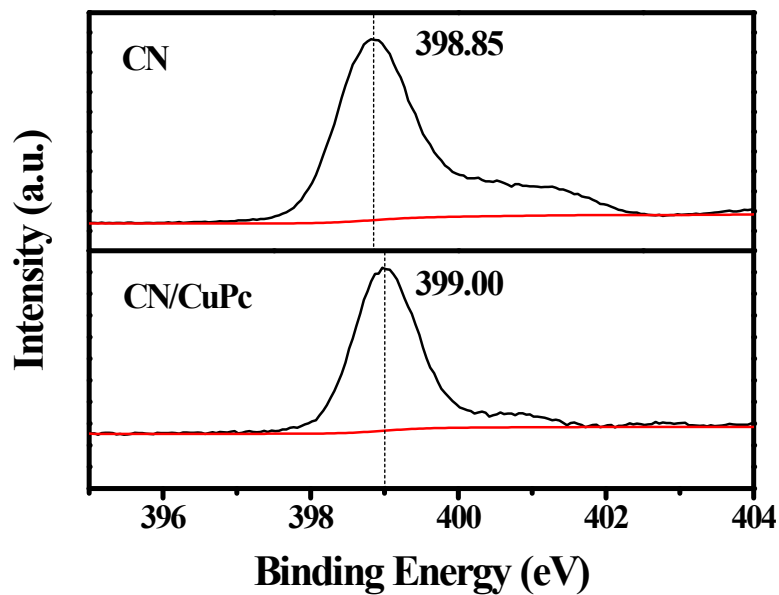

Fig. S6 N 1s XPS of CN and CN/CuPc.

## 2.6 PHE measurements of CN and CN/CuPc heterojunctions

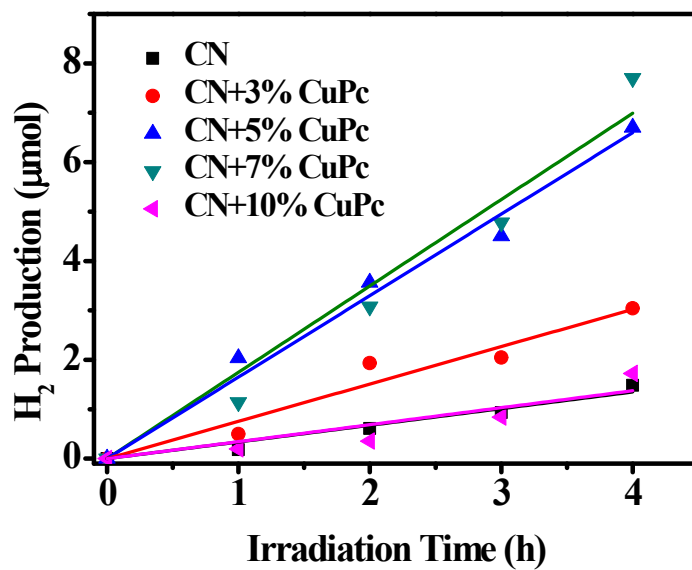

Fig. S7 PHE measurements of CN and CN/CuPc heterojunctions. TEOA was used as hole sacrificial agent and no cocatalyst was used. A 300w Xenon lamp was used as the light source.

**Table S1** Summary of the PHE rates derived from Fig. S7

| Photocatalysts | Hydrogen Evolution Rate ( $\mu\text{mol g}^{-1} \text{h}^{-1}$ ) |
|----------------|------------------------------------------------------------------|
| CN             | 15.2                                                             |
| CN+3%CuPc      | 29.9                                                             |
| CN+5%CuPc      | 64.9                                                             |
| CN+7%CuPc      | 71.2                                                             |
| CN+10%CuPc     | 16.9                                                             |

### 2.7 XRD of CN/CuPc before and after PHE test

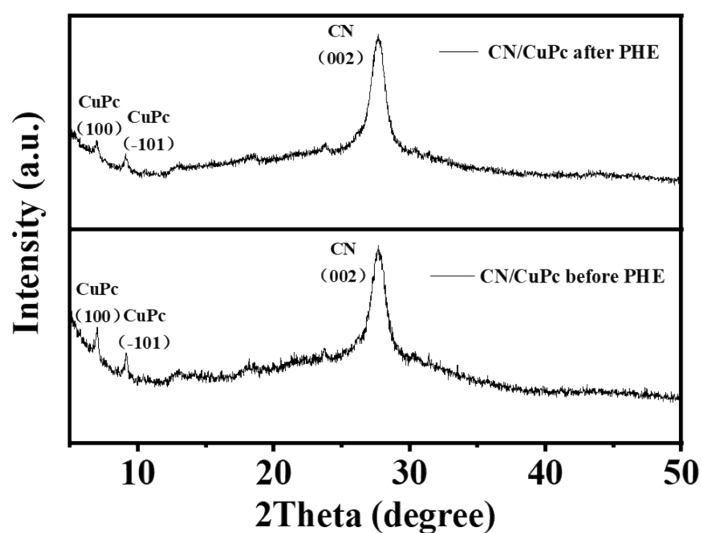

**Fig. S8** XRD of CN/CuPc before and after the PHE test.

### 2.8 PHE testing irradiated at monochromatic light

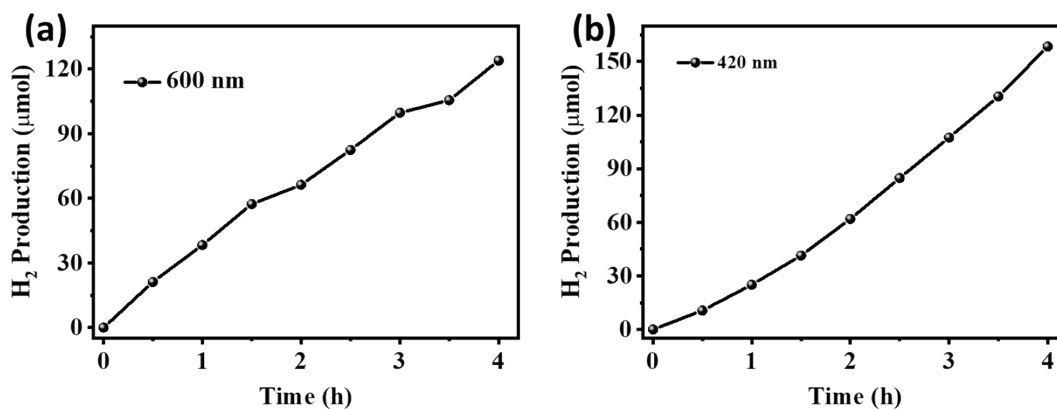

**Fig. S9** PHE testing of CN/CuPc irradiated at (a) 600nm and (b) 420nm.

## 2.9 PHE testing of pure CuPc

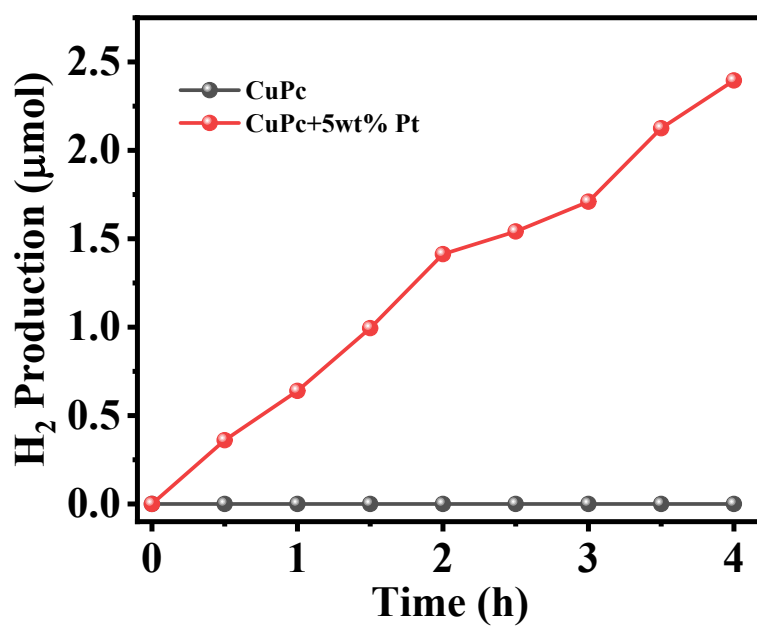

Fig. S10 PHE testing of pure CuPc with and without Pt.
